# Supplementary material for: Fitting Transporter Activities to Cellular Drug Concentrations and Fluxes: Why the Bumblebee Can Fly
Source: PubMed Central journal article supplement (PMC4642801; doi:10.1016/j.tips.2015.07.006), 2015-11
Supplement: mmc1.pdf [file mmc1.pdf]

# Fitting standard distributions to data of Matsson *et al.*

*Pedro Mendes, Stephen G. Oliver, Douglas B. Kell*

17-06-2015

## 1. Introduction

Matsson *et al.* (2015) provide data for transporter concentration (hereafter “ $T0$ ”) and  $k_{cat}$ , and histograms of  $K_m$ . They sampled values from the empirical distributions of their data, however in our software COPASI this is not possible; rather values must be drawn from normal, log-normal or gamma distributions. Thus we need to fit their data to the best of those three distributions. Visually it is clear that the data are not normal, and thus here we fit them to log-normal and gamma distributions. Fits are carried out through maximum likelihood estimation and selection of best fit was carried out based on Akaike’s information criterion.

Estimation of parametric distribution coefficients was carried out with R (R Core Team, 2014) using the `fitdistrplus` package (Pouillot & Delignette-Muller, 2010). The code is reproduced in this document. The best fit distributions were then used with the modelling software COPASI (Hoops *et al.*, 2006) to generate 10,000 different models (of a single transporter) by random sampling from those distributions. The COPASI sampled parameters are compared here to the original data and the density of the distributions.

## 2. Data

### $K_m$

$K_m$  data is, unfortunately, given as a frequency histogram, but we need a full set of data to fit to distributions. A surrogate data set is then created by repeating the midpoint in each bin as many times as the frequency of that bin. The new data set is then ready for the MLE fit.

```
# the (given) break points for the bins for Km histogram
kmbins = c(1e-3, 10^(-2.5), 1e-2, 10^(-1.5), 1e-1, 10^(-0.5), 1, 10^(0.5), 10,
           10^(1.5), 1e2, 10^(2.5), 1e3, 10^(3.5), 1e4, 10^(4.5), 1e5)
# the (calculated) midpoints of the histogram bins
kmmids = c( 10^(-2.75), 10^(-2.25), 10^(-1.75), 10^(-1.25), 10^(-0.75), 10^(-0.25),
           10^(0.25), 10^(0.75), 10^(1.25), 10^(1.75), 10^(2.25), 10^(2.75),
           10^(3.25), 10^(3.75), 10^(4.25), 10^(4.75) )
# frequency for SLC and ABC transporters, given the break points above
FreqSLC = c(1,3,2,15,15,21,37,73,102,60,47,28,22,15,3,1)
FreqABC = c(0,0,1,10,11,19,29,62,56,32,34,23,11,5,0,0)
# because we only have histogram, we have to create a surrogate data series
# according to histogram (repeating the midpoint Freq number of times)
km <- rep(kmmids,FreqSLC)
```

### $T0$

$T0$  data (transporter concentration) is given explicitly in fmol/ mg total protein. However we need to convert this to pmol/mg total protein (a factor of  $10^{-3}$ ).

```
t0 <- c(34200, 12200, 10600, 10500, 9000, 7700, 7010, 5880, 4870, 3370, 2730,
        2710, 2450, 2320, 2320, 2170, 2160, 2030, 1750, 1710, 1690, 1630, 1540,
        1440, 1300, 1280, 1280, 1230, 1210, 1090, 1020, 980, 980, 790, 780,
        650, 620, 590, 550, 490, 470, 470, 470, 460, 440, 380, 360, 300, 290,
        290, 280, 260, 240, 210, 210, 200, 200, 180, 180, 150, 150, 140, 120,
        120, 120, 110, 110, 110, 99, 97, 89, 85, 84, 79, 77, 75, 73, 72, 66,
        62, 62, 57, 52, 46, 44, 43, 43, 42, 37, 36, 35, 32, 30, 27, 26, 24, 22,
        17, 13, 12)
t0 <- t0 * 1e-3
```

$k_{cat}$

$k_{cat}$  data is also given explicitly:

```
kcat <- c( 14, 10, 9.2, 6, 5.8, 3, 1, 5, 2, 1200, 450, 966, 567, 280, 1000,
          650, 600, 57, 30, 25, 11, 20, 13, 6, 2.2, 1.2, 3.7, 2.8, 0.6, 1, 1,
          1, 0.7, 0.3, 130, 70, 85, 4, 5, 1.5, 0.2, 2.5, 0.5, 0.12, 69, 8,
          300)
```

### 3. Maximum likelyhood estimation of distribution parameters

$K_m$

```
library(fitdistrplus)
kmfitG <- fitdist(km,"gamma",start=list(scale=1,shape=1), lower=1e-8)
kmfitLN <- fitdist(km,"lnorm")
# compare goodness of fit estimates
summary(kmfitLN)
```

```
## Fitting of the distribution ' lnorm ' by maximum likelihood
## Parameters :
##      estimate Std. Error
## meanlog 2.981718 0.13414454
## sdlog   2.829782 0.09485446
## Loglikelihood: -2421.181   AIC: 4846.362   BIC: 4854.559
## Correlation matrix:
##      meanlog sdlog
## meanlog      1      0
## sdlog        0      1
```

```
summary(kmfitG)
```

```
## Fitting of the distribution ' gamma ' by maximum likelihood
## Parameters :
##      estimate Std. Error
## scale 2757.8722975 316.74770265
## shape  0.2141684   0.01106001
## Loglikelihood: -2539.008   AIC: 5082.015   BIC: 5090.211
```

```
## Correlation matrix:
##          scale      shape
## scale  1.0000000 -0.4505311
## shape -0.4505311  1.0000000
```

```
gofstat(list(kmfitLN,kmfitG), fitnames=c("lnorm","gamma"))
```

```
## Goodness-of-fit statistics
##          lnorm      gamma
## Kolmogorov-Smirnov statistic 0.1190807  0.2659812
## Cramer-von Mises statistic  0.9712746  7.2098402
## Anderson-Darling statistic  4.8653835 34.8105455
##
## Goodness-of-fit criteria
##          lnorm      gamma
## Aikake's Information Criterion 4846.362 5082.015
## Bayesian Information Criterion 4854.559 5090.211
```

```
cdfcomp(list(kmfitLN,kmfitG), legendtext=c("lnorm","gamma"),xlogscale=T, main="Km")
```

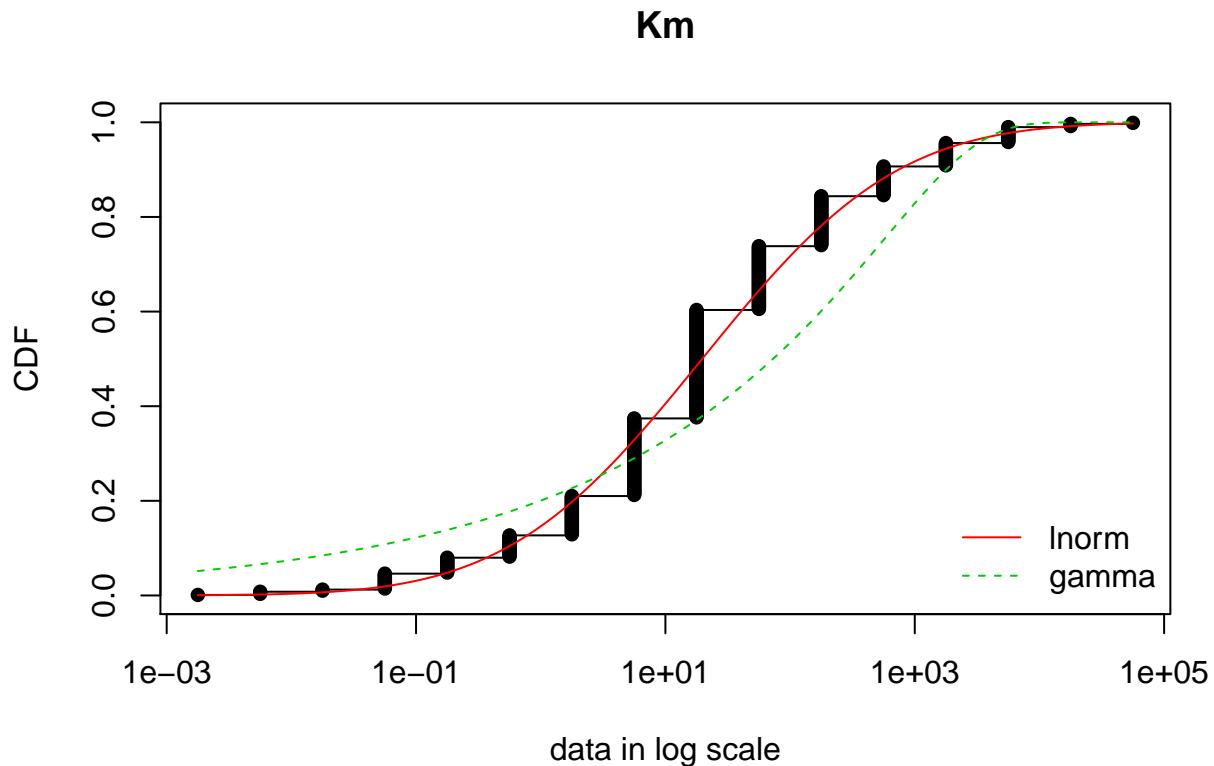

The log-normal distribution with  $\text{meanlog}=2.981718$  and  $\text{sdlog}=2.829782$  is adopted to describe the  $K_m$  data as it has a lower AIC value and the distribution is clearly closer to the (surrogate) data.

***T0***

```
tOfitG <- fitdist(t0,"gamma",start=list(scale=1,shape=1), lower=1e-8)
tOfitLN <- fitdist(t0,"lnorm")
# compare goodness of fit estimates
summary(tOfitLN)
```

```
## Fitting of the distribution ' lnorm ' by maximum likelihood
## Parameters :
##      estimate Std. Error
## meanlog -1.121480  0.1793716
## sdlog    1.793716  0.1268347
## Loglikelihood: -88.17483  AIC: 180.3497  BIC: 185.56
## Correlation matrix:
##      meanlog      sdlog
## meanlog 1.000000e+00 -4.041308e-11
## sdlog   -4.041308e-11 1.000000e+00
```

```
summary(tOfitG)
```

```
## Fitting of the distribution ' gamma ' by maximum likelihood
## Parameters :
##      estimate Std. Error
## scale 3.7939727 0.73237923
## shape 0.4151268 0.04764835
## Loglikelihood: -107.1486  AIC: 218.2972  BIC: 223.5075
## Correlation matrix:
##      scale      shape
## scale 1.0000000 -0.5946002
## shape -0.5946002 1.0000000
```

```
gofstat(list(tOfitLN,tOfitG), fitnames=c("lnorm","gamma"))
```

```
## Goodness-of-fit statistics
##              lnorm      gamma
## Kolmogorov-Smirnov statistic 0.09117613 0.1455117
## Cramer-von Mises statistic  0.12856200 0.7401482
## Anderson-Darling statistic  0.76992474 4.1049645
##
## Goodness-of-fit criteria
##              lnorm      gamma
## Aikake's Information Criterion 180.3497 218.2972
## Bayesian Information Criterion 185.5600 223.5075
```

```
cdfcomp(list(tOfitLN,tOfitG), legendtext=c("lnorm","gamma"),xlogscale=T, main="T0")
```

## T0

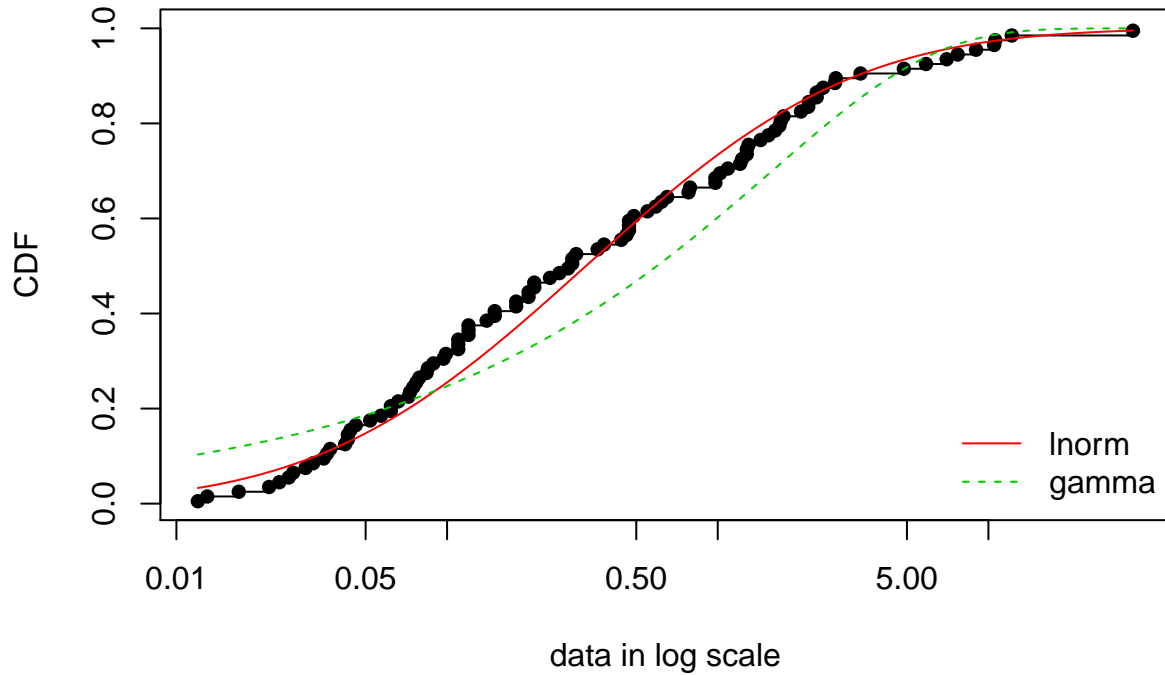

The log-normal distribution with  $\text{meanlog}=-1.121480$  and  $\text{sdlog}=1.793716$  is adopted to describe the  $T_0$  data as it has a lower AIC value and the distribution is clearly closer to the (surrogate) data.

$k_{cat}$

```
kcatfitG <- fitdist(kcat,"gamma",start=list(scale=1,shape=1), lower=1e-8)
kcatfitLN <- fitdist(kcat,"lnorm")
# compare goodness of fit estimates
summary(kcatfitLN)
```

```
## Fitting of the distribution ' lnorm ' by maximum likelihood
## Parameters :
##      estimate Std. Error
## meanlog 2.405581  0.3626783
## sdlog   2.486397  0.2564521
## Loglikelihood: -222.5617  AIC:  449.1233  BIC:  452.8236
## Correlation matrix:
##      meanlog      sdlog
## meanlog  1.000000e+00 -6.608731e-10
## sdlog   -6.608731e-10  1.000000e+00
```

```
summary(kcatfitG)
```

```
## Fitting of the distribution ' gamma ' by maximum likelihood
## Parameters :
##      estimate  Std. Error
```

```
## scale 511.8383572 164.59911965
## shape 0.2751321 0.04450247
## Loglikelihood: -231.3404 AIC: 466.6809 BIC: 470.3812
## Correlation matrix:
## scale shape
## scale 1.0000000 -0.5026713
## shape -0.5026713 1.0000000
```

```
gofstat(list(kcatfitLN,kcatfitG), fitnames=c("lnorm","gamma"))
```

```
## Goodness-of-fit statistics
## lnorm gamma
## Kolmogorov-Smirnov statistic 0.1081347 0.2286459
## Cramer-von Mises statistic 0.1185118 0.5989112
## Anderson-Darling statistic 0.7649438 2.9766586
##
## Goodness-of-fit criteria
## lnorm gamma
## Aikake's Information Criterion 449.1233 466.6809
## Bayesian Information Criterion 452.8236 470.3812
```

```
cdfcomp(list(kcatfitLN,kcatfitG), legendtext=c("lnorm","gamma"),xlogscale=T, main="kcat")
```

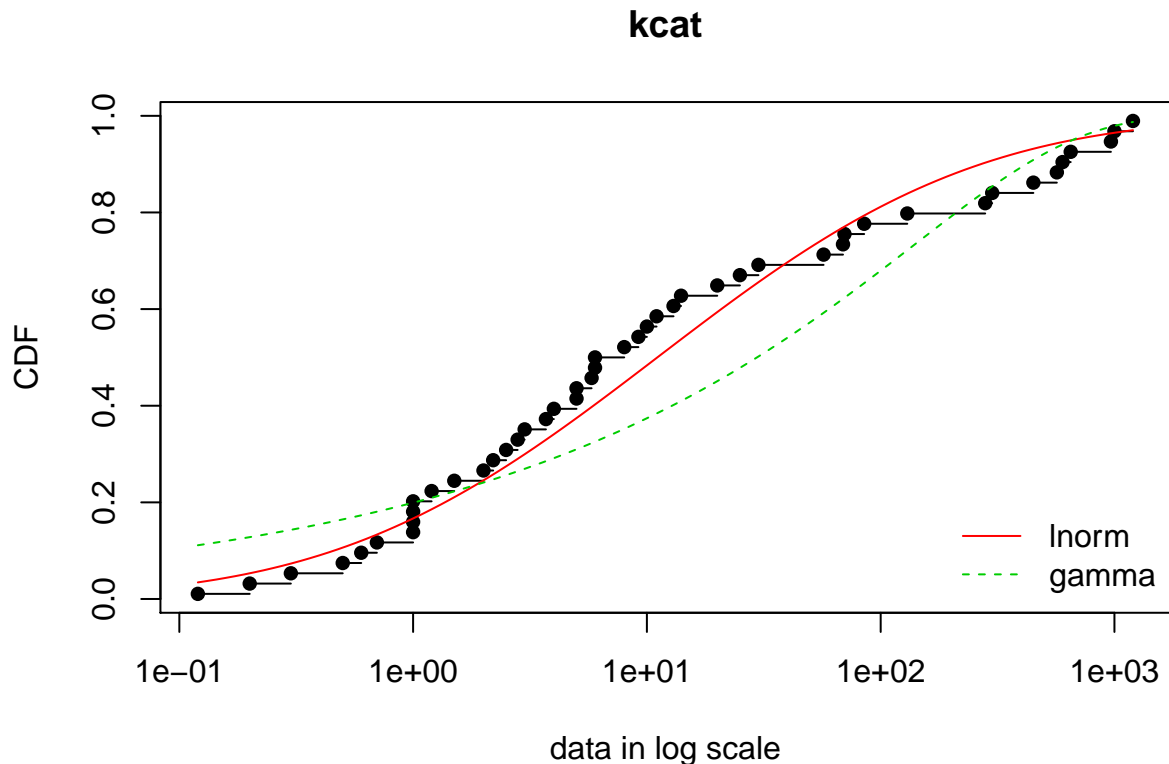

The log-normal distribution with  $\text{meanlog}=2.405581$  and  $\text{sdlog}=2.486397$  is adopted to describe the  $k_{cat}$  data as it has a lower AIC value and the distribution is clearly closer to the (surrogate) data.

## Simulated data *versus* given data

The log-normal distributions obtained for each of the parameters were then used in COPASI to sample 10,000 combinations of random values for the three parameters. We now compare the data simulated with COPASI to the original data in order to visually inspect the extent of agreement between the empirical and the MLE log-normal distributions.

```
# read the sampling data simulated with COPASI
myData = read.table("sampling10k.txt")
```

$K_m$

```
library(ggplot2)
# density functions for plotting fitted distributions
kmg = rlnorm(1000000, 2.981718, 2.829782)
ggplot() +
  geom_histogram(aes(x=km,y=..density..), binwidth=0.5, fill="red", alpha=0.25) +
  scale_x_log10() + theme_bw() +
  geom_histogram(aes(x=myData[[1]], y=..density..), binwidth=0.5, fill="blue", alpha=0.25) +
  geom_density(aes(x=kmg, y=..density..), line="black")
```

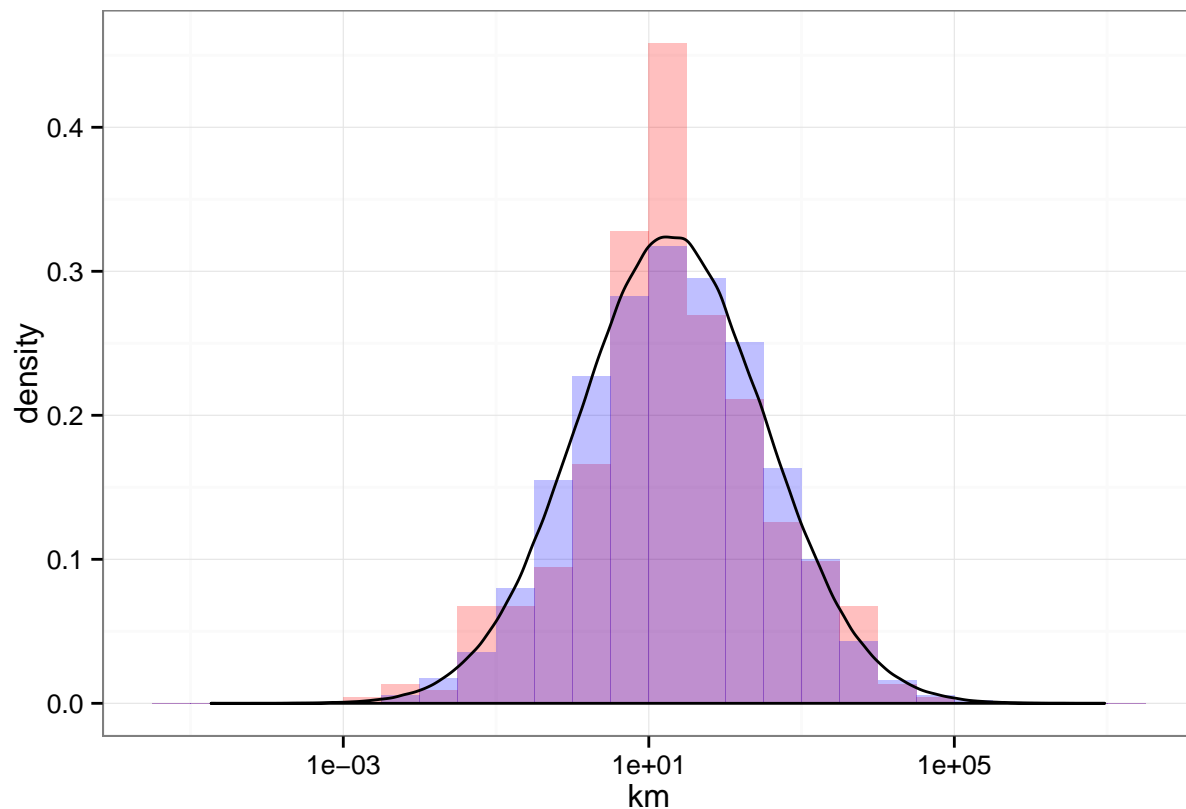

Histogram in red corresponds to the data in Matsson *et al.* (2015), histogram in blue to the data generated with COPASI. Black line is the density of the log-normal distribution with the fitted parameters.

## $T_0$

```
t0g = rlnorm(1000000, -1.121480, 1.793716)
ggplot() +
  geom_histogram(aes(x=t0,y=..density..), binwidth=0.1, fill="red", alpha=0.25) +
  scale_x_log10() + theme_bw() +
  geom_histogram(aes(x=myData[[3]], y=..density..), binwidth=0.1, fill="blue", alpha=0.25) +
  geom_density(aes(x=t0g, y=..density..), line="black")
```

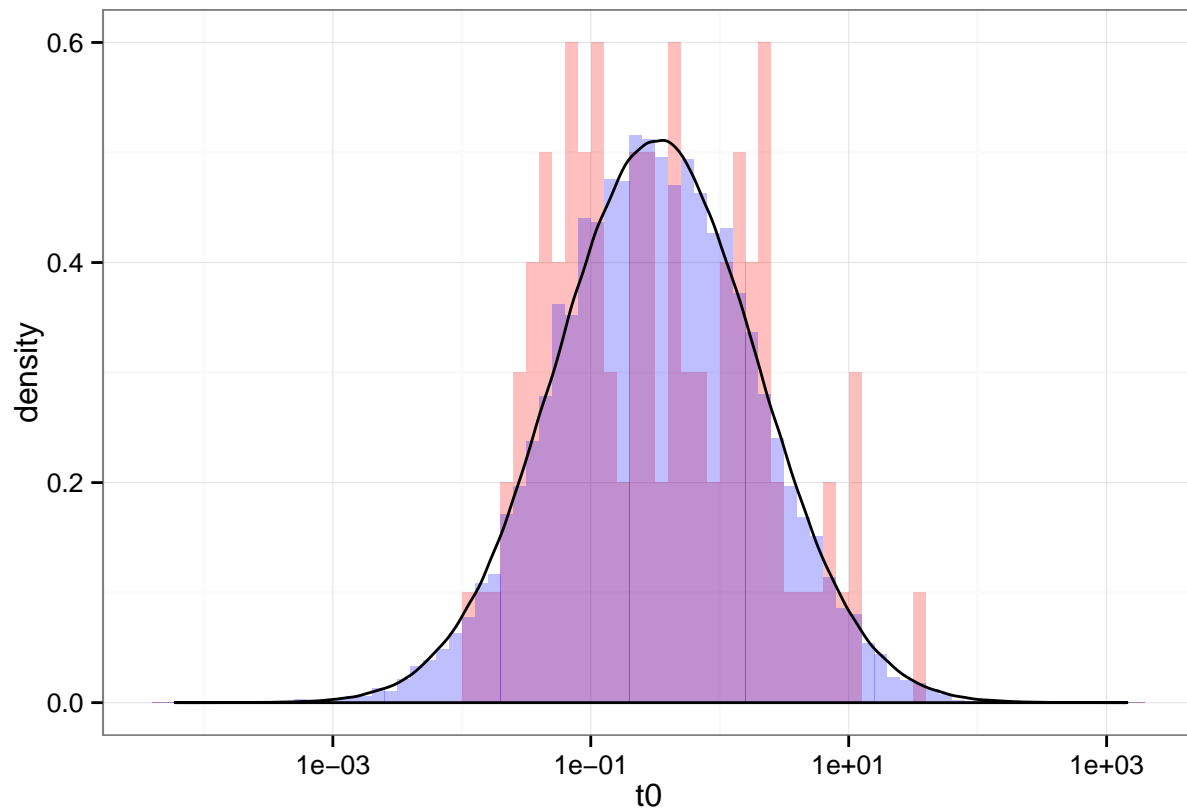

Histogram in red corresponds to the data in Matsson *et al.* (2015), histogram in blue to the data generated with COPASI. Black line is the density of the log-normal distribution with the fitted parameters.

## $k_{cat}$

```
kcatg = rlnorm(1000000, 2.405581, 2.486397)
ggplot() +
  geom_histogram(aes(x=kcat,y=..density..), binwidth=0.25, fill="red", alpha=0.25) +
  scale_x_log10() + theme_bw() +
  geom_histogram(aes(x=myData[[2]], y=..density..), binwidth=0.25, fill="blue", alpha=0.25) +
  geom_density(aes(x=kcatg, y=..density..), line="black")
```



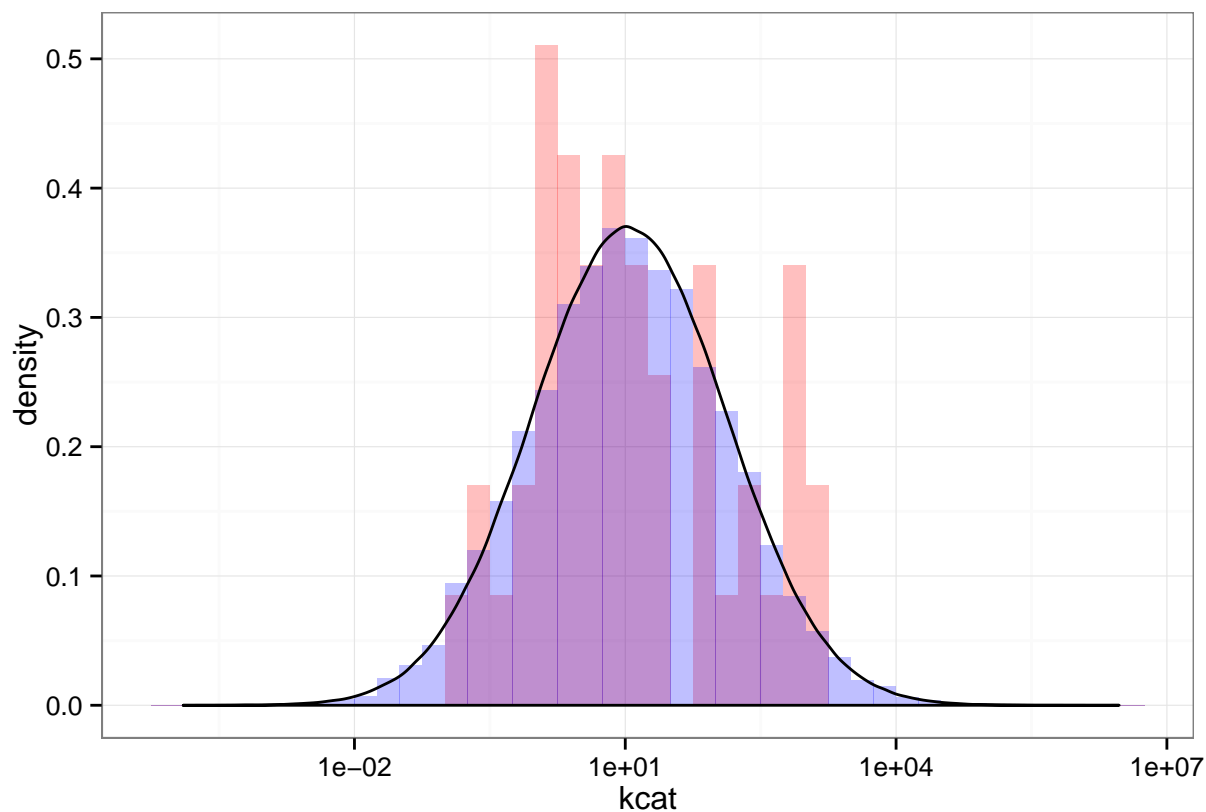

Histogram in red corresponds to the data in Matsson *et al.* (2015), histogram in blue to the data generated with COPASI. Black line is the density of the log-normal distribution with the fitted parameters.

## 4. Conclusion

The log-normal distributions are sufficiently close to the empirical distributions and therefore were adopted for this study. They were used to estimate the proportion of times that systems with 1, 2, or 5 transporters are able to match the permeability of verapamil ( $1310 \times 10^{-6}$  cm/s).

## 5. References

- Hoops S., Sahle S., Gauges R., Lee C., Pahle J., Simus N., Singhal M., Xu L., Mendes P. & Kummer U. (2006) COPASI — a CComplex PATHway SIMulator. *Bioinformatics* **22**, 3067-74.
- Matsson P, Fenu L.A., Lundquist P., Wiśniewski J.R., Kansy M. & Artursson P. (2015) Addendum to ‘Quantifying the impact of transporters on cellular drug permeability’, *Trends in Pharmacological Sciences*.
- Pouillot R. & Delignette-Muller M.L. (2010) Evaluating variability and uncertainty separately in microbial quantitative risk assessment using two R packages, *International Journal of Food Microbiology* **142**, 330-40.
- R Core Team (2014) R: A Language and Environment for Statistical Computing, *R Foundation for Statistical Computing*: Vienna, Austria. <http://www.R-project.org>
